# Supplementary material for: Using mixed methods to assess fidelity of delivery and its influencing factors in a complex self-management intervention for people with osteoarthritis and low back pain
Source: PubMed Central journal article supplement — BMJ Open. 2017 Aug 4;7(8):e015452. doi: 10.1136/bmjopen-2016-015452 (PMC5724095; doi:10.1136/bmjopen-2016-015452), 2017-08-04
Supplement: bmjopen-2016-015452supp001.pdf [file bmjopen-2016-015452supp001.pdf]

## Supplementary Files

### Supplementary File 1: Quantitative fidelity checklists used

#### INTERVENTION SESSION CHECKLIST (OBSERVATION/AUDIO-RECORDING):

##### Cover sheet (completed for each session)

|                                        |                                                                                                                                                                   |
|----------------------------------------|-------------------------------------------------------------------------------------------------------------------------------------------------------------------|
| <b>Date:</b>                           |                                                                                                                                                                   |
| <b>Venue:</b>                          |                                                                                                                                                                   |
| <b>Physiotherapist Name:</b>           |                                                                                                                                                                   |
| <b>Other staff involved:</b>           | Name(s):<br>Role: (e.g. set-up/delivery/support)                                                                                                                  |
| <b>Session number (tick):</b>          | 1 <input type="checkbox"/> 2 <input type="checkbox"/> 3 <input type="checkbox"/> 4 <input type="checkbox"/> 5 <input type="checkbox"/> 6 <input type="checkbox"/> |
| <b>Start time (class):</b>             |                                                                                                                                                                   |
| <b>Finish time (class):</b>            |                                                                                                                                                                   |
| <b>Time spent on education (mins):</b> |                                                                                                                                                                   |
| <b>Time spent on exercise (mins):</b>  |                                                                                                                                                                   |
| <b>Method of Observation:</b>          | In-vivo/Audio-recording                                                                                                                                           |

|                                                                         |                                   |
|-------------------------------------------------------------------------|-----------------------------------|
| <p><b>Adverse event(s)/issue(s) (circle):</b></p> <p>Y/N</p>            | <p>If yes give brief details:</p> |
| <p><b>Deviations from protocol/proscribed components delivered?</b></p> | <p>Yes/No</p> <p>Details:</p>     |

|                                                                                              |                          |                          |                          |            |
|----------------------------------------------------------------------------------------------|--------------------------|--------------------------|--------------------------|------------|
| <b>General notes on fidelity of session:</b>                                                 |                          |                          |                          |            |
| <b>INTERVENTION COMPONENT CHECKLIST:</b>                                                     | <b>YES<br/>(2)</b>       | <b>NO<br/>(0)</b>        | <b>ATTEMPTED<br/>(1)</b> | <b>N/A</b> |
| <b>Session 1:</b>                                                                            |                          |                          |                          |            |
| <b>Materials</b>                                                                             |                          |                          |                          |            |
| <b>Intervention folder</b> given to participants                                             | <input type="checkbox"/> | <input type="checkbox"/> | <input type="checkbox"/> |            |
| Use of <b>participant intervention folder</b> actively facilitated <b>throughout</b> session | <input type="checkbox"/> | <input type="checkbox"/> | <input type="checkbox"/> |            |
| <b>Name stickers/badges</b> given to participants                                            | <input type="checkbox"/> | <input type="checkbox"/> | <input type="checkbox"/> |            |
| <b>Pens offered/provided</b>                                                                 | <input type="checkbox"/> | <input type="checkbox"/> | <input type="checkbox"/> |            |
| <b>Powerpoint slides</b> used                                                                | <input type="checkbox"/> | <input type="checkbox"/> | <input type="checkbox"/> |            |

| <b>Introduction</b>                                                                            |                          |                          |                          |  |
|------------------------------------------------------------------------------------------------|--------------------------|--------------------------|--------------------------|--|
| <b>Introductions/welcome</b> made                                                              | <input type="checkbox"/> | <input type="checkbox"/> | <input type="checkbox"/> |  |
| Set <b>clear expectations - aims, content</b> and <b>structure</b> of programme addressed      | <input type="checkbox"/> | <input type="checkbox"/> | <input type="checkbox"/> |  |
| <b>Rationale</b> for <b>weekly attendance</b> provided                                         | <input type="checkbox"/> | <input type="checkbox"/> | <input type="checkbox"/> |  |
| <b>Education</b>                                                                               |                          |                          |                          |  |
| <b>Rationale</b> for <b>self-management</b> provided                                           | <input type="checkbox"/> | <input type="checkbox"/> | <input type="checkbox"/> |  |
| <b>Posture</b> addressed                                                                       | <input type="checkbox"/> | <input type="checkbox"/> | <input type="checkbox"/> |  |
| <b>Cycle of change</b> addressed                                                               | <input type="checkbox"/> | <input type="checkbox"/> | <input type="checkbox"/> |  |
| <b>Disease characteristics, prevalence and causes</b> of OA/CLBP addressed                     | <input type="checkbox"/> | <input type="checkbox"/> | <input type="checkbox"/> |  |
| <b>Recommended activity levels/benefits of exercise</b> addressed                              | <input type="checkbox"/> | <input type="checkbox"/> | <input type="checkbox"/> |  |
| <b>Individual reflection on activity/recommendations</b> facilitated                           | <input type="checkbox"/> | <input type="checkbox"/> | <input type="checkbox"/> |  |
| <b>Goal setting</b> introduced                                                                 | <input type="checkbox"/> | <input type="checkbox"/> | <input type="checkbox"/> |  |
| <b>Action planning</b> introduced                                                              | <input type="checkbox"/> | <input type="checkbox"/> | <input type="checkbox"/> |  |
| Attention drawn to <b>Action Plan sheets</b> within intervention folder, <b>encouraged use</b> | <input type="checkbox"/> | <input type="checkbox"/> | <input type="checkbox"/> |  |
| Attention drawn to <b>Activity Diaries</b> within intervention folder, <b>encouraged use</b>   | <input type="checkbox"/> | <input type="checkbox"/> | <input type="checkbox"/> |  |

|                                                                                                      |                               |                          |                          |                          |
|------------------------------------------------------------------------------------------------------|-------------------------------|--------------------------|--------------------------|--------------------------|
| Participants given a chance/encouraged to <b>contribute to discussion</b>                            | <input type="checkbox"/>      | <input type="checkbox"/> | <input type="checkbox"/> |                          |
| <b>Exercise</b>                                                                                      |                               |                          |                          |                          |
| <b>Room set up</b> for exercise (equipment, sheets)                                                  | <input type="checkbox"/>      | <input type="checkbox"/> | <input type="checkbox"/> |                          |
| <b>Protocol exercises demonstrated</b>                                                               | <input type="checkbox"/>      | <input type="checkbox"/> | <input type="checkbox"/> |                          |
| Attention drawn to <b>Exercise Programme Diary</b> within intervention folder, <b>encouraged use</b> | <input type="checkbox"/>      | <input type="checkbox"/> | <input type="checkbox"/> |                          |
| <b>Rationale</b> for <b>exercises</b> provided                                                       | <input type="checkbox"/>      | <input type="checkbox"/> | <input type="checkbox"/> |                          |
| Participants given a chance to <b>attempt and practice protocol</b> exercises                        | <input type="checkbox"/>      | <input type="checkbox"/> | <input type="checkbox"/> |                          |
| <b>Individual feedback</b> provided                                                                  | <input type="checkbox"/>      | <input type="checkbox"/> | <input type="checkbox"/> | <input type="checkbox"/> |
| <b>Review and Planning</b>                                                                           |                               |                          |                          |                          |
| Session review - <b>activity levels and goal setting recap</b>                                       | <input type="checkbox"/>      | <input type="checkbox"/> | <input type="checkbox"/> |                          |
| <b>Proscribed components delivered?</b>                                                              | <input type="checkbox"/> (-2) | <input type="checkbox"/> |                          |                          |
| Total score (Yes = 2, Attempted = 1, No =0)                                                          |                               |                          |                          |                          |
| Overall Adherence score                                                                              |                               |                          |                          |                          |
| <b>Session 2:</b>                                                                                    |                               |                          |                          |                          |

| <b>INTERVENTION COMPONENT CHECKLIST:</b>                                                     | <b>YES<br/>(2)</b>       | <b>NO<br/>(0)</b>        | <b>ATTEMPTED<br/>(1)</b> | <b>N/A</b>               |
|----------------------------------------------------------------------------------------------|--------------------------|--------------------------|--------------------------|--------------------------|
| <b>Materials</b>                                                                             |                          |                          |                          |                          |
| Use of <b>participant intervention folder</b> actively facilitated <b>throughout</b> session | <input type="checkbox"/> | <input type="checkbox"/> | <input type="checkbox"/> |                          |
| <b>Name stickers/badges</b> given to participants                                            | <input type="checkbox"/> | <input type="checkbox"/> | <input type="checkbox"/> | <input type="checkbox"/> |
| <b>Pens offered/provided</b>                                                                 | <input type="checkbox"/> | <input type="checkbox"/> | <input type="checkbox"/> |                          |
| <b>Pedometers</b> offered                                                                    | <input type="checkbox"/> | <input type="checkbox"/> | <input type="checkbox"/> |                          |
| <b>Powerpoint slides</b> used                                                                | <input type="checkbox"/> | <input type="checkbox"/> | <input type="checkbox"/> |                          |
| <b>Recap and Review</b>                                                                      |                          |                          |                          |                          |
| <b>Welcome back</b> made                                                                     | <input type="checkbox"/> | <input type="checkbox"/> | <input type="checkbox"/> |                          |
| <b>Review</b> of previous week <b>activities/action plans</b>                                | <input type="checkbox"/> | <input type="checkbox"/> | <input type="checkbox"/> |                          |
| <b>Education</b>                                                                             |                          |                          |                          |                          |
| <b>Set clear expectations – content of session</b> outlined                                  | <input type="checkbox"/> | <input type="checkbox"/> | <input type="checkbox"/> |                          |
| <b>Activity-rest cycle</b> and <b>pacing</b> explained                                       | <input type="checkbox"/> | <input type="checkbox"/> | <input type="checkbox"/> |                          |
| <b>Individual reflection</b> on <b>current pacing/activity-rest</b> facilitated              | <input type="checkbox"/> | <input type="checkbox"/> | <input type="checkbox"/> |                          |
| <b>Factors influencing pain</b> addressed                                                    | <input type="checkbox"/> | <input type="checkbox"/> | <input type="checkbox"/> |                          |
| <b>Goal setting</b> facilitated                                                              | <input type="checkbox"/> | <input type="checkbox"/> | <input type="checkbox"/> |                          |
| <b>Action planning</b> facilitated                                                           | <input type="checkbox"/> | <input type="checkbox"/> | <input type="checkbox"/> |                          |
| <b>Action Plan sheets</b> use encouraged/facilitated                                         | <input type="checkbox"/> | <input type="checkbox"/> | <input type="checkbox"/> |                          |

|                                                                                                    |                               |                          |                          |                          |
|----------------------------------------------------------------------------------------------------|-------------------------------|--------------------------|--------------------------|--------------------------|
| Attention drawn to <b>Walking/Activity Diary</b> within intervention folder, <b>encouraged use</b> | <input type="checkbox"/>      | <input type="checkbox"/> | <input type="checkbox"/> |                          |
| Participants given a chance/encouraged to <b>contribute to discussion</b>                          | <input type="checkbox"/>      | <input type="checkbox"/> | <input type="checkbox"/> |                          |
| <b>Exercise</b>                                                                                    |                               |                          |                          |                          |
| <b>Room set up</b> for exercise (equipment, sheets)                                                | <input type="checkbox"/>      | <input type="checkbox"/> | <input type="checkbox"/> |                          |
| <b>Protocol exercises demonstrated</b>                                                             | <input type="checkbox"/>      | <input type="checkbox"/> | <input type="checkbox"/> | <input type="checkbox"/> |
| <b>Exercise Programme Diary</b> use encouraged                                                     | <input type="checkbox"/>      | <input type="checkbox"/> | <input type="checkbox"/> |                          |
| <b>Rationale</b> for exercises provided                                                            | <input type="checkbox"/>      | <input type="checkbox"/> | <input type="checkbox"/> |                          |
| Participants given a chance to <b>attempt and practice protocol</b> exercises                      | <input type="checkbox"/>      | <input type="checkbox"/> | <input type="checkbox"/> |                          |
| <b>Individual feedback</b> provided                                                                | <input type="checkbox"/>      | <input type="checkbox"/> | <input type="checkbox"/> | <input type="checkbox"/> |
| <b>Session Planning and Review</b>                                                                 |                               |                          |                          |                          |
| Session review - <b>goal setting and action planning recap</b>                                     | <input type="checkbox"/>      | <input type="checkbox"/> | <input type="checkbox"/> |                          |
| <b>Proscribed components delivered?</b>                                                            | <input type="checkbox"/> (-2) | <input type="checkbox"/> |                          |                          |
| Total score (Yes = 2, Attempted = 1, No =0)                                                        |                               |                          |                          |                          |
| Overall Adherence score                                                                            |                               |                          |                          |                          |
| <b>Session 3:</b>                                                                                  |                               |                          |                          |                          |
| <b>INTERVENTION COMPONENT CHECKLIST:</b>                                                           | <b>YES</b>                    | <b>NO</b>                | <b>ATTEMPTED<br/>(1)</b> | <b>N/A</b>               |

|                                                                                                       | (2)                      | (0)                      |                          |                          |
|-------------------------------------------------------------------------------------------------------|--------------------------|--------------------------|--------------------------|--------------------------|
| <b>Materials</b>                                                                                      |                          |                          |                          |                          |
| Use of <b>participant intervention folder</b> actively facilitated <b>throughout</b> session          | <input type="checkbox"/> | <input type="checkbox"/> | <input type="checkbox"/> |                          |
| <b>Tape measures</b> offered                                                                          | <input type="checkbox"/> | <input type="checkbox"/> | <input type="checkbox"/> |                          |
| <b>Pens offered/provided</b>                                                                          | <input type="checkbox"/> | <input type="checkbox"/> | <input type="checkbox"/> |                          |
| <b>Powerpoint slides</b> used                                                                         | <input type="checkbox"/> | <input type="checkbox"/> | <input type="checkbox"/> |                          |
| <b>Recap and Review</b>                                                                               |                          |                          |                          |                          |
| Previous week <b>Activity Action Plan</b> reviewed                                                    | <input type="checkbox"/> | <input type="checkbox"/> | <input type="checkbox"/> |                          |
| <b>Problem-solving</b> of previous week <b>Activity Action Plan</b>                                   | <input type="checkbox"/> | <input type="checkbox"/> | <input type="checkbox"/> | <input type="checkbox"/> |
| <b>Action Plan sheets</b> use encouraged/facilitated                                                  | <input type="checkbox"/> | <input type="checkbox"/> | <input type="checkbox"/> |                          |
| <b>Education</b>                                                                                      |                          |                          |                          |                          |
| <b>Set clear expectations – content of session</b> outlined                                           | <input type="checkbox"/> | <input type="checkbox"/> | <input type="checkbox"/> |                          |
| <b>Obesity and effect on pain</b> addressed                                                           | <input type="checkbox"/> | <input type="checkbox"/> | <input type="checkbox"/> |                          |
| <b>Balance between weight/activity</b> addressed                                                      | <input type="checkbox"/> | <input type="checkbox"/> | <input type="checkbox"/> |                          |
| <b>Individual reflection</b> on <b>weight/activity</b> balance facilitated                            | <input type="checkbox"/> | <input type="checkbox"/> | <input type="checkbox"/> |                          |
| <b>Skills for maintaining healthy weight</b> addressed (e.g. waist measurement, food diary)           | <input type="checkbox"/> | <input type="checkbox"/> | <input type="checkbox"/> |                          |
| Attention drawn to <b>Healthy Eating Booklet</b> within intervention folder, <b>encouraged use</b>    |                          |                          |                          |                          |
| Attention drawn to <b>Walking/ Activity Diary</b> within intervention folder, <b>encouraged use</b>   | <input type="checkbox"/> | <input type="checkbox"/> | <input type="checkbox"/> |                          |
| Attention drawn to <b>Food &amp; Exercise Diary</b> within intervention folder, <b>encouraged use</b> | <input type="checkbox"/> | <input type="checkbox"/> | <input type="checkbox"/> |                          |



|                                                                                                           |                               |                          |                          |                          |
|-----------------------------------------------------------------------------------------------------------|-------------------------------|--------------------------|--------------------------|--------------------------|
| Participants given a chance/encouraged to <b>contribute to discussion</b>                                 | <input type="checkbox"/>      | <input type="checkbox"/> | <input type="checkbox"/> |                          |
| <b>Exercise</b>                                                                                           |                               |                          |                          |                          |
| <b>Room set up</b> for exercise (equipment, sheets)                                                       | <input type="checkbox"/>      | <input type="checkbox"/> | <input type="checkbox"/> |                          |
| <b>Protocol exercises demonstrated</b>                                                                    | <input type="checkbox"/>      | <input type="checkbox"/> | <input type="checkbox"/> | <input type="checkbox"/> |
| <b>Exercise Programme Diary</b> use encouraged                                                            | <input type="checkbox"/>      | <input type="checkbox"/> | <input type="checkbox"/> |                          |
| <b>Rationale</b> for <b>exercises</b> provided                                                            | <input type="checkbox"/>      | <input type="checkbox"/> | <input type="checkbox"/> |                          |
| Participants given a chance to <b>attempt and practice protocol</b> exercises                             | <input type="checkbox"/>      | <input type="checkbox"/> | <input type="checkbox"/> |                          |
| <b>Individual feedback</b> provided                                                                       | <input type="checkbox"/>      | <input type="checkbox"/> | <input type="checkbox"/> | <input type="checkbox"/> |
| <b>Session Planning and Review</b>                                                                        |                               |                          |                          |                          |
| Session review - <b>goal setting and action planning</b> recap integrating <b>food and exercise diary</b> | <input type="checkbox"/>      | <input type="checkbox"/> | <input type="checkbox"/> |                          |
| <b>Proscribed components delivered?</b>                                                                   | <input type="checkbox"/> (-2) | <input type="checkbox"/> |                          |                          |
| Total score (Yes = 2, Attempted = 1, No =0)                                                               |                               |                          |                          |                          |
| Overall Adherence score                                                                                   |                               |                          |                          |                          |
| <b>Session 4:</b>                                                                                         |                               |                          |                          |                          |
| <b>INTERVENTION COMPONENT CHECKLIST:</b>                                                                  | <b>YES</b>                    | <b>NO</b>                | <b>ATTEMPTED<br/>(1)</b> | <b>N/A</b>               |

|                                                                                              | (2)                      | (0)                      |                          |                          |
|----------------------------------------------------------------------------------------------|--------------------------|--------------------------|--------------------------|--------------------------|
| <b>Materials</b>                                                                             |                          |                          |                          |                          |
| Use of <b>participant intervention folder</b> actively facilitated <b>throughout</b> session | <input type="checkbox"/> | <input type="checkbox"/> | <input type="checkbox"/> |                          |
| <b>Pens offered/provided</b>                                                                 | <input type="checkbox"/> | <input type="checkbox"/> | <input type="checkbox"/> |                          |
| <b>Powerpoint slides</b> used                                                                | <input type="checkbox"/> | <input type="checkbox"/> | <input type="checkbox"/> |                          |
| <b>Midway Recap and Review</b>                                                               |                          |                          |                          |                          |
| Previous week <b>Activity Action Plan</b> reviewed                                           | <input type="checkbox"/> | <input type="checkbox"/> | <input type="checkbox"/> |                          |
| <b>Problem-solving</b> of previous week <b>Activity Action Plan</b>                          | <input type="checkbox"/> | <input type="checkbox"/> | <input type="checkbox"/> | <input type="checkbox"/> |
| <b>Action Plan sheets</b> use encouraged/facilitated                                         | <input type="checkbox"/> | <input type="checkbox"/> | <input type="checkbox"/> |                          |
| <b>Walking/ Activity Diary</b> use encouraged                                                | <input type="checkbox"/> | <input type="checkbox"/> | <input type="checkbox"/> |                          |
| <b>Education</b>                                                                             |                          |                          |                          |                          |
| <b>Set clear expectations – content of session</b> outlined                                  | <input type="checkbox"/> | <input type="checkbox"/> | <input type="checkbox"/> |                          |
| <b>Rationale</b> for using <b>pain relief</b> given (e.g. <b>pain pathway</b> explained)     | <input type="checkbox"/> | <input type="checkbox"/> | <input type="checkbox"/> |                          |
| <b>Methods of pain relief</b> addressed (e.g. medication, heat/ice, TENS/acupuncture)        | <input type="checkbox"/> | <input type="checkbox"/> | <input type="checkbox"/> |                          |
| <b>Individual reflection</b> on use of <b>pain relief</b> facilitated                        | <input type="checkbox"/> | <input type="checkbox"/> | <input type="checkbox"/> |                          |
| Participants given a chance/encouraged to <b>contribute to discussion</b>                    | <input type="checkbox"/> | <input type="checkbox"/> | <input type="checkbox"/> |                          |
| <b>Exercise</b>                                                                              |                          |                          |                          |                          |
| <b>Room set up</b> for exercise (equipment, sheets)                                          | <input type="checkbox"/> | <input type="checkbox"/> | <input type="checkbox"/> |                          |
| <b>Protocol</b> exercises <b>demonstrated</b>                                                | <input type="checkbox"/> | <input type="checkbox"/> | <input type="checkbox"/> | <input type="checkbox"/> |
| <b>Exercise Programme Diary</b> use encouraged                                               | <input type="checkbox"/> | <input type="checkbox"/> | <input type="checkbox"/> |                          |

|                                                                                              |                               |                          |                          |                          |
|----------------------------------------------------------------------------------------------|-------------------------------|--------------------------|--------------------------|--------------------------|
| <b>Rationale for exercises provided</b>                                                      | <input type="checkbox"/>      | <input type="checkbox"/> | <input type="checkbox"/> |                          |
| Participants given a chance to <b>attempt and practice protocol</b> exercises                | <input type="checkbox"/>      | <input type="checkbox"/> | <input type="checkbox"/> |                          |
| <b>Individual feedback</b> provided                                                          | <input type="checkbox"/>      | <input type="checkbox"/> | <input type="checkbox"/> | <input type="checkbox"/> |
| <b>Session Planning and Review</b>                                                           |                               |                          |                          |                          |
| Session review - <b>goal setting and action planning</b> recap                               | <input type="checkbox"/>      | <input type="checkbox"/> | <input type="checkbox"/> |                          |
| <b>Proscribed components delivered?</b>                                                      | <input type="checkbox"/> (-2) | <input type="checkbox"/> |                          |                          |
| Total score (Yes = 2, Attempted = 1, No =0)                                                  |                               |                          |                          |                          |
| Overall Adherence score                                                                      |                               |                          |                          |                          |
| <b>Session 5:</b>                                                                            |                               |                          |                          |                          |
| <b>INTERVENTION COMPONENT CHECKLIST:</b>                                                     | <b>YES<br/>(2)</b>            | <b>NO<br/>(0)</b>        | <b>ATTEMPTED<br/>(1)</b> | <b>N/A</b>               |
| <b>Materials</b>                                                                             |                               |                          |                          |                          |
| Use of <b>participant intervention folder</b> actively facilitated <b>throughout</b> session | <input type="checkbox"/>      | <input type="checkbox"/> | <input type="checkbox"/> |                          |
| <b>Pens offered/provided</b>                                                                 | <input type="checkbox"/>      | <input type="checkbox"/> | <input type="checkbox"/> |                          |
| <b>Relaxation CD</b> offered                                                                 | <input type="checkbox"/>      | <input type="checkbox"/> | <input type="checkbox"/> |                          |
| <b>Powerpoint slides</b> used                                                                | <input type="checkbox"/>      | <input type="checkbox"/> | <input type="checkbox"/> |                          |
| <b>Recap and Review</b>                                                                      |                               |                          |                          |                          |

|                                                                               |                          |                          |                          |                          |
|-------------------------------------------------------------------------------|--------------------------|--------------------------|--------------------------|--------------------------|
| Previous week <b>Activity Action Plan</b> reviewed                            | <input type="checkbox"/> | <input type="checkbox"/> | <input type="checkbox"/> |                          |
| <b>Problem-solving</b> of previous week <b>Activity Action Plan</b>           | <input type="checkbox"/> | <input type="checkbox"/> | <input type="checkbox"/> | <input type="checkbox"/> |
| <b>Action Plan sheets</b> use encouraged/facilitated                          | <input type="checkbox"/> | <input type="checkbox"/> | <input type="checkbox"/> |                          |
| <b>Walking/ Activity Diary</b> use encouraged                                 | <input type="checkbox"/> | <input type="checkbox"/> | <input type="checkbox"/> |                          |
| <b>Education</b>                                                              |                          |                          |                          |                          |
| <b>Set clear expectations – content of session</b> outlined                   | <input type="checkbox"/> | <input type="checkbox"/> | <input type="checkbox"/> |                          |
| <b>Recognising and managing flare-ups</b> addressed                           | <input type="checkbox"/> | <input type="checkbox"/> | <input type="checkbox"/> |                          |
| <b>Individual reflection</b> about <b>flare-ups</b> facilitated               | <input type="checkbox"/> | <input type="checkbox"/> | <input type="checkbox"/> |                          |
| <b>Effect of mood on pain</b> addressed                                       | <input type="checkbox"/> | <input type="checkbox"/> | <input type="checkbox"/> |                          |
| Participants given a chance/encouraged to <b>contribute to discussion</b>     | <input type="checkbox"/> | <input type="checkbox"/> | <input type="checkbox"/> |                          |
| <b>Exercise</b>                                                               |                          |                          |                          |                          |
| <b>Room set up</b> for exercise (equipment, sheets)                           | <input type="checkbox"/> | <input type="checkbox"/> | <input type="checkbox"/> |                          |
| <b>Protocol exercises demonstrated</b>                                        | <input type="checkbox"/> | <input type="checkbox"/> | <input type="checkbox"/> | <input type="checkbox"/> |
| <b>Exercise Programme Diary</b> use encouraged                                | <input type="checkbox"/> | <input type="checkbox"/> | <input type="checkbox"/> |                          |
| <b>Rationale</b> for <b>exercises</b> provided                                | <input type="checkbox"/> | <input type="checkbox"/> | <input type="checkbox"/> |                          |
| Participants given a chance to <b>attempt and practice protocol</b> exercises | <input type="checkbox"/> | <input type="checkbox"/> | <input type="checkbox"/> |                          |
| <b>Individual feedback</b> provided                                           | <input type="checkbox"/> | <input type="checkbox"/> | <input type="checkbox"/> | <input type="checkbox"/> |
| <b>Relaxation Session</b>                                                     |                          |                          |                          |                          |
| <b>Relaxation techniques explained</b> and <b>practiced</b>                   | <input type="checkbox"/> | <input type="checkbox"/> | <input type="checkbox"/> |                          |
| <b>Session Planning and Review</b>                                            |                          |                          |                          |                          |

|                                                                                                                 |                               |                          |                          |                          |
|-----------------------------------------------------------------------------------------------------------------|-------------------------------|--------------------------|--------------------------|--------------------------|
| Session review - <b>goal setting and action planning</b> recap with <b>integration of relaxation techniques</b> | <input type="checkbox"/>      | <input type="checkbox"/> | <input type="checkbox"/> |                          |
| <b>Proscribed components delivered?</b>                                                                         | <input type="checkbox"/> (-2) | <input type="checkbox"/> |                          |                          |
| Total score (Yes = 2, Attempted = 1, No =0)                                                                     |                               |                          |                          |                          |
| Overall Adherence score                                                                                         |                               |                          |                          |                          |
| <b>Session 6:</b>                                                                                               |                               |                          |                          |                          |
| <b>INTERVENTION COMPONENT CHECKLIST:</b>                                                                        | <b>YES<br/>(2)</b>            | <b>NO<br/>(0)</b>        | <b>ATTEMPTED<br/>(1)</b> | <b>N/A</b>               |
| <b>Materials</b>                                                                                                |                               |                          |                          |                          |
| Use of <b>participant intervention folder</b> actively facilitated <b>throughout</b> session                    | <input type="checkbox"/>      | <input type="checkbox"/> | <input type="checkbox"/> |                          |
| <b>Pens offered/provided</b>                                                                                    | <input type="checkbox"/>      | <input type="checkbox"/> | <input type="checkbox"/> |                          |
| <b>Handouts on local resources and supports</b> provided                                                        | <input type="checkbox"/>      | <input type="checkbox"/> | <input type="checkbox"/> |                          |
| <b>Powerpoint slides</b> used                                                                                   | <input type="checkbox"/>      | <input type="checkbox"/> | <input type="checkbox"/> |                          |
| <b>Recap and Review</b>                                                                                         |                               |                          |                          |                          |
| Previous week <b>Activity Action Plan</b> reviewed                                                              | <input type="checkbox"/>      | <input type="checkbox"/> | <input type="checkbox"/> |                          |
| <b>Problem-solving</b> of previous week <b>Activity Action Plan</b>                                             | <input type="checkbox"/>      | <input type="checkbox"/> | <input type="checkbox"/> | <input type="checkbox"/> |
| <b>Action Plan sheets</b> use encouraged/facilitated                                                            | <input type="checkbox"/>      | <input type="checkbox"/> | <input type="checkbox"/> |                          |
| <b>Walking/ Activity Diary</b> use encouraged                                                                   | <input type="checkbox"/>      | <input type="checkbox"/> | <input type="checkbox"/> |                          |
| <b>Education</b>                                                                                                |                               |                          |                          |                          |

|                                                                               |                               |                          |                          |                          |
|-------------------------------------------------------------------------------|-------------------------------|--------------------------|--------------------------|--------------------------|
| <b>Set clear expectations – content of session</b> outlined                   | <input type="checkbox"/>      | <input type="checkbox"/> | <input type="checkbox"/> |                          |
| <b>Core skills of programme</b> reviewed                                      | <input type="checkbox"/>      | <input type="checkbox"/> | <input type="checkbox"/> |                          |
| <b>Aims of long-term self-management</b> addressed                            | <input type="checkbox"/>      | <input type="checkbox"/> | <input type="checkbox"/> |                          |
| <b>Local resources and supports</b> discussed                                 | <input type="checkbox"/>      | <input type="checkbox"/> | <input type="checkbox"/> |                          |
| Participants given a chance/encouraged to <b>contribute to discussion</b>     | <input type="checkbox"/>      | <input type="checkbox"/> | <input type="checkbox"/> |                          |
| <b>Exercise</b>                                                               |                               |                          |                          |                          |
| <b>Room set up</b> for exercise (equipment, sheets)                           | <input type="checkbox"/>      | <input type="checkbox"/> | <input type="checkbox"/> |                          |
| <b>Protocol exercises demonstrated</b>                                        | <input type="checkbox"/>      | <input type="checkbox"/> | <input type="checkbox"/> | <input type="checkbox"/> |
| <b>Exercise Programme Diary</b> use encouraged                                | <input type="checkbox"/>      | <input type="checkbox"/> | <input type="checkbox"/> |                          |
| <b>Rationale</b> for exercises provided                                       | <input type="checkbox"/>      | <input type="checkbox"/> | <input type="checkbox"/> |                          |
| Participants given a chance to <b>attempt and practice protocol</b> exercises | <input type="checkbox"/>      | <input type="checkbox"/> | <input type="checkbox"/> |                          |
| <b>Individual feedback</b> provided                                           | <input type="checkbox"/>      | <input type="checkbox"/> | <input type="checkbox"/> | <input type="checkbox"/> |
| <b>Session Planning and Review</b>                                            |                               |                          |                          |                          |
| Session review – <b>long term goal setting and action planning</b> recap      | <input type="checkbox"/>      | <input type="checkbox"/> | <input type="checkbox"/> |                          |
| Activity diaries <b>use recorded</b> (if willing)                             | <input type="checkbox"/>      | <input type="checkbox"/> | <input type="checkbox"/> |                          |
| <b>Proscribed components delivered?</b>                                       | <input type="checkbox"/> (-2) | <input type="checkbox"/> |                          |                          |
| Total score (Yes = 2, Attempted = 1, No =0)                                   |                               |                          |                          |                          |
| Overall Adherence score                                                       |                               |                          |                          |                          |

|  |
|--|
|  |
|--|

**Yes** = Fully addressed by the Physiotherapist – could not do more

**Attempted** = Reasonable attempt made to address this – could do more

**No** = No attempt made to address this

### INTERVENTION SESSION CHECKLIST (SELF-REPORT)

**Self-report checklists covered similar components to observation and audio as provided above - different cover sheet (completed for each session) provided below**

|                   |              |                                                |                              |
|-------------------|--------------|------------------------------------------------|------------------------------|
| <b>PCCC Site:</b> | <b>Date:</b> | <b>Class: circle</b><br><br><b>1 2 3 4 5 6</b> | <b>Physiotherapist Name:</b> |
|-------------------|--------------|------------------------------------------------|------------------------------|

#### PERSONNEL

|                                                  |                                                          |                           |
|--------------------------------------------------|----------------------------------------------------------|---------------------------|
| <b>Other staff involved in setting up class:</b> | Yes <input type="checkbox"/> No <input type="checkbox"/> | <b>Names/Staff Grade:</b> |
| <b>Other staff involved in providing class:</b>  | Yes <input type="checkbox"/> No <input type="checkbox"/> | <b>Names/Staff Grade:</b> |

|  |  |  |
|--|--|--|
|  |  |  |
|--|--|--|

**ATTENDANCE**

|                         | Present                               | Absent |
|-------------------------|---------------------------------------|--------|
| Number of Clients:      |                                       |        |
| Names of non-attenders: | Reasons for non-attendance [if known] |        |
| 1.                      |                                       |        |
| 2.                      |                                       |        |
| 3.                      |                                       |        |
| 4.                      |                                       |        |

**CLASS PREPARATION**

|                                     |                                 |                                    |
|-------------------------------------|---------------------------------|------------------------------------|
| Time to review materials<br>[mins]: | Time to set up class<br>[mins]: | Time to take down class<br>[mins]: |
| Start Time:                         | End Time:                       | Comments:                          |

**CLASS DELIVERY**

|  |           |          |
|--|-----------|----------|
|  | Education | Exercise |
|--|-----------|----------|



|                                                  |                                                          |                                                          |
|--------------------------------------------------|----------------------------------------------------------|----------------------------------------------------------|
| <b>Time to deliver [mins]:</b>                   |                                                          |                                                          |
| <b>Comments:</b>                                 |                                                          |                                                          |
| <b>Deviations from protocol:</b><br>Content/time | Yes <input type="checkbox"/> No <input type="checkbox"/> | Yes <input type="checkbox"/> No <input type="checkbox"/> |
| <b>If 'yes' give details and reason[s]</b>       |                                                          |                                                          |

**TREATMENT-RELATED EVENT – any unforeseen event/issue should be reported to Deirdre Hurley**

|                                                                               |                                                                              |                                                                                     |
|-------------------------------------------------------------------------------|------------------------------------------------------------------------------|-------------------------------------------------------------------------------------|
| <b>During class:</b> Yes <input type="checkbox"/> No <input type="checkbox"/> | <b>After class:</b> Yes <input type="checkbox"/> No <input type="checkbox"/> | <b>Reported to Deirdre</b> Yes <input type="checkbox"/> No <input type="checkbox"/> |
|-------------------------------------------------------------------------------|------------------------------------------------------------------------------|-------------------------------------------------------------------------------------|

When patient is discharged please give this completed form to UCD Research Physiotherapist or scan and email to [physiostudy@ucd.ie](mailto:physiostudy@ucd.ie)

| <b>Supplementary File 2: Physiotherapist baseline characteristics</b> |        |       |       |       |        |       |       |       |       |       |
|-----------------------------------------------------------------------|--------|-------|-------|-------|--------|-------|-------|-------|-------|-------|
|                                                                       | Wave 1 |       |       |       | Wave 2 |       |       |       |       |       |
| Physiotherapy Site                                                    | A      | B     | C     | D     | A      | B     | C     | E     | F     | G     |
| Physiotherapist                                                       | A1     | B1    | C1    | D1    | A1     | B2    | C2    | E1    | F1    | G1    |
| Gender                                                                | F      | F     | F     | M     | F      | F     | F     | F     | F     | F     |
| Experience<br>(years qualified)                                       | 5      | 25    | 8     | 12    | 5      | 25    | 10    | 6     | 19    | 11    |
| Group experience<br>(years delivering<br>group<br>physiotherapy)      | 1      | 3     | 8     | 2     | 1      | 10    | 3     | 1     | 15    | 7     |
| Post-training<br>evaluation score (%)                                 | 74%    | 81.5% | 90.5% | 83.4% | 74%    | 88.5% | 81.8% | 81.2% | 78.1% | 94.4% |
| Previous training in<br>similar interventions<br>(Y/N)                | N      | Y     | Y     | Y     | N      | Y     | Y     | Y     | Y     | Y     |
| F= female, M=male, Y=yes, N=no                                        |        |       |       |       |        |       |       |       |       |       |

## Supplementary File 3: Physiotherapist interviews topic guide

### SOLAS Programme Semi-Structured Interviews with Physiotherapists

#### Interview Schedule

**Ice-breaker** – describe your experience in running group-based programmes for these or other populations before this study. How many weeks of the SOLAS programme did you deliver?

#### Therapist Views on Experience of Delivering the Programme

- What are your overall impressions of the programme having delivered it for first/second time?
  - Content overall and week by week –education and exercise components – time for each- managing group dynamics – mixed ability/diagnosis and ages of clients
- What aspects did you find easy/challenging to deliver?  
[content/communication/behaviour change/goal setting/action planning – these were emphasised in training]
- Views on feasibility of class size of up to 8 clients with one physiotherapist to deliver?  
[none delivered a class of this size – their views on running small numbers v the target of 8]
- How well do you feel you delivered the programme as intended from the training received?
  - Following the slide content/script – was it difficult/did you want to edit - which parts?
  - Content/needs supportive delivery style/ behaviour change techniques
  - Views on giving advice/setting goals with patients and following through and being needs supportive (using SDT) e.g. using non-controlling language, enabling patient input and choice; providing positive and personalised feedback to patients?
  - Difficult/constrained by research?
- For the aspects not delivered as planned from training give reasons –
  - prompt on potential barriers to delivery [the availability of resources (e.g. staffing, suitable venue, administrative staff, time constraints); appropriate patient selection and screening, patient uptake and engagement with programme and the potential need to individualise treatment within group]
- How much additional work did delivering the programme and participating in this study place upon you? [Specify – preparation time – reading the manual and supplementary materials, setting up the venue, time to deliver – on top of other work, completion of treatment record forms after each class, completion of post training questionnaires]?
  - Is this acceptable? What modifications would you suggest for future waves?
- What are your impressions of the resources provided to you to support delivery of the programme? [Training Manual /Intervention Manual/Intervention Slides/SOLAS poster]
  - How much have you used them? What was useful/not useful in terms of helping you deliver the programme as intended?
  - Views on continuing to use powerpoint versus flip chart or handouts only?
  - Suggestions for modifications for future waves
- What are your impressions of the venue in terms of its suitability for delivering the programme? [Prompt – accessibility, space, equipment for delivering education and exercise component number of stations, sound quality to allow communication to the

group/individuals during exercises

**Views on sustainability of the Programme**

- What is your opinion of the feasibility of delivering the programme in the future within the study/within normal practice?
- Would you deliver the programme outside the study?
- How would you deliver it? What materials would you use? What would you leave out? Who would you deliver it to?

**Views on Research Elements of the Programme**

- Views on research elements of the programme [pre and post training questionnaires, direct observation during classes, audio recordings, treatment record forms]
  - Intrusiveness/time/feasibility Any suggestions for modifications for future waves
- Views on level and modes of communication with the research team throughout the study from training to completion of this wave
  - Suggestions for modifications for future waves

| <b>Supplementary File 4: Agreement between assessment methods</b> |                                               |                                                           |                                             |                                                                           |
|-------------------------------------------------------------------|-----------------------------------------------|-----------------------------------------------------------|---------------------------------------------|---------------------------------------------------------------------------|
|                                                                   | Direct Observation v<br>Self-Report<br>(n=24) | Direct<br>Observation v<br>Audio-<br>Recordings<br>(n=24) | Audio-Recordings v<br>Self-Report<br>(n=60) | Audio-Recordings<br>Rater 1 v Rater 2<br>(Inter-rater reliability) (n=12) |
| <b>Overall agreement</b>                                          | 74.6%                                         | 86.6%                                                     | 75.4%                                       | 84.6%                                                                     |
| <b>% Agreement per category:</b>                                  |                                               |                                                           |                                             |                                                                           |
| <b>Materials</b>                                                  | 74.5%                                         | 82.67%                                                    | 70.1%                                       | 84.6%                                                                     |
| <b>Introduction and<br/>Review</b>                                | 65.3%                                         | 86.5%                                                     | 57%                                         | 81.6%                                                                     |
| <b>Education</b>                                                  | 84.6%                                         | 90.3%                                                     | 87.3%                                       | 76.7%                                                                     |
| <b>Exercise</b>                                                   | 70.8%                                         | 86%                                                       | 78%                                         | 83.3%                                                                     |
| <b>Review and<br/>Planning</b>                                    | 50%                                           | 76.2%                                                     | 46%                                         | 100%                                                                      |

| <b>Supplementary file 5: Average duration according to method and session (methods combined)</b> |                                 |                                               |                    |                         |                                                |          |          |          |          |          |
|--------------------------------------------------------------------------------------------------|---------------------------------|-----------------------------------------------|--------------------|-------------------------|------------------------------------------------|----------|----------|----------|----------|----------|
|                                                                                                  | <b>Intended duration (mins)</b> | <b>Actual duration (mins) for each method</b> |                    |                         | <b>Actual duration (mins) for each session</b> |          |          |          |          |          |
|                                                                                                  |                                 | <b>Direct Observations</b>                    | <b>Self-Report</b> | <b>Audio-Recordings</b> | <b>1</b>                                       | <b>2</b> | <b>3</b> | <b>4</b> | <b>5</b> | <b>6</b> |
| <b>Education Duration Mean (SD)</b>                                                              | 45                              | 46.6<br>(15.6)                                | 44.6<br>(12)       | 45.1<br>(14.7)          | 58.9**                                         | 41.6     | 47.7     | 46.5     | 42.4     | 42.4     |
| <b>Exercise Duration Mean (SD)</b>                                                               | 45                              | 38.6<br>(8.2)*                                | 38.9<br>(7.7)*     | 38.7<br>(8.9)*          | 31.4**                                         | 42.7     | 39.2     | 38.0     | 39.8     | 41.5     |
| <b>Total Duration Mean (SD)</b>                                                                  | 90                              | 85.3<br>(11.3)***                             | 83.4<br>(11.4)**   | 83.5<br>(10.5)**        | 89.3                                           | 84.3     | 86.0     | 84.5     | 83.3     | 74.3     |
| * p=0.001 ** p<0.001 ***p<0.05                                                                   |                                 |                                               |                    |                         |                                                |          |          |          |          |          |

**Supplementary file 6: Group size**

|                                                                                                                                                                                           | Wave 1                                |            |          |            | Wave 2     |            |            |            |            |            | Total n=            |
|-------------------------------------------------------------------------------------------------------------------------------------------------------------------------------------------|---------------------------------------|------------|----------|------------|------------|------------|------------|------------|------------|------------|---------------------|
| <b>Physiotherapy Site (Physiotherapist)</b>                                                                                                                                               | A (A1)                                | B (B1)     | C (C1)   | D (D1)     | A (A1)     | B (B2)     | C (C2)     | E (E1)     | F (F1)     | G (G1)     | 7<br>(9)            |
| <b>Average no. of participants present* (total recruited*)</b>                                                                                                                            | 3.7<br>(4)                            | 4.8<br>(6) | 3<br>(4) | 1.8<br>(2) | 1.5<br>(4) | 2.8<br>(4) | 2.5<br>(5) | 2.7<br>(4) | 4.5<br>(7) | 2.5<br>(5) | 3<br><br>(SD = 1.3) |
| Session                                                                                                                                                                                   | <b>Mean participants present (SD)</b> |            |          |            |            |            |            |            |            |            |                     |
| 1                                                                                                                                                                                         | 3.3 (1.4)                             |            |          |            |            |            |            |            |            |            | NS<br>p=0.8         |
| 2                                                                                                                                                                                         | 3.4 (1.5)                             |            |          |            |            |            |            |            |            |            |                     |
| 3                                                                                                                                                                                         | 2.8 (1.1)                             |            |          |            |            |            |            |            |            |            |                     |
| 4                                                                                                                                                                                         | 2.9 (1.3)                             |            |          |            |            |            |            |            |            |            |                     |
| 5                                                                                                                                                                                         | 2.8 (1.0)                             |            |          |            |            |            |            |            |            |            |                     |
| 6                                                                                                                                                                                         | 2.7 (1.2)                             |            |          |            |            |            |            |            |            |            |                     |
| <p>*significant difference between physiotherapists for number of participants recruited and average numbers present, p&lt;0.001</p> <p>NS = non-significant, SD = standard deviation</p> |                                       |            |          |            |            |            |            |            |            |            |                     |
